# Supplementary material for: High performance of MoS2 microflowers with a water-based binder as an anode for Na-ion batteries
Source: Royal Society of Chemistry journal article supplement (doi:10.1039/c5ra16297a), 2015-01-01
Supplement: c5ra16297a1.pdf [file c5ra16297a1.pdf]

## Electronic Supporting Information

### High performance of MoS<sub>2</sub> microflowers with water-based binder as an anode for Na-ion batteries

P. Ramesh Kumar, Young Hwa Jung and Do Kyung Kim\*

*Department of Materials Science and Engineering, Korea Advanced Institute of Science and Technology (KAIST), Daejeon 305-701, Republic of Korea*

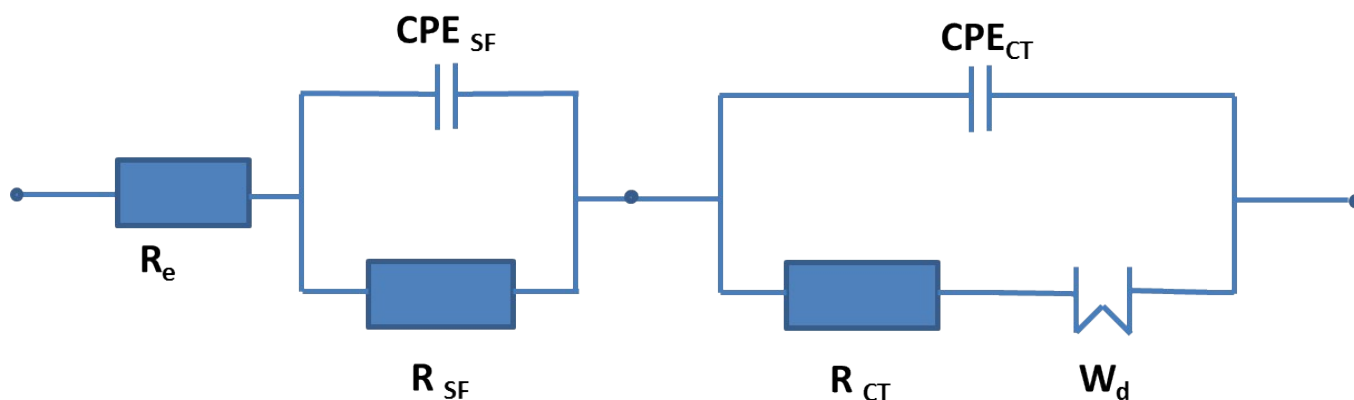

**Fig. S1** An equivalent circuit for analysis of the EIS results.

**Table S1** The electrolyte ( $R_e$ ), the inseparable surface film ( $R_{SF}$ ) and charge transfer ( $R_{CT}$ ) resistances and the finite Warburg impedance ( $W_d$ ) values are listed.

| <b>Voltage</b>     | <b><math>R_e</math> (Ohm)</b> | <b><math>R_{SF}</math> (Ohm)</b> | <b><math>R_{CT}</math> (Ohm)</b> | <b><math>W_d</math></b> |
|--------------------|-------------------------------|----------------------------------|----------------------------------|-------------------------|
| <b>Discharging</b> |                               |                                  |                                  |                         |
| <b>OCV</b>         | <b>5.59</b>                   | <b>193</b>                       | <b>23</b>                        | <b>0.85</b>             |
| <b>2V</b>          | <b>5.6</b>                    | <b>181</b>                       | <b>43</b>                        | <b>0.85</b>             |
| <b>1.6V</b>        | <b>5.6</b>                    | <b>167</b>                       |                                  | <b>0.85</b>             |
| <b>0.8</b>         | <b>5.77</b>                   | <b>164</b>                       | <b>114</b>                       | <b>0.87</b>             |
| <b>0.4</b>         | <b>5.9</b>                    | <b>99</b>                        | <b>198</b>                       | <b>0.87</b>             |
| <b>0.002</b>       | <b>5.5</b>                    | <b>99</b>                        | <b>126</b>                       | <b>0.74</b>             |
| <b>Charging</b>    |                               |                                  |                                  |                         |
| <b>0.6</b>         | <b>5.8</b>                    | <b>110</b>                       | <b>85</b>                        | <b>0.84</b>             |
| <b>1.2</b>         | <b>5.8</b>                    | <b>93</b>                        | <b>36</b>                        | <b>0.89</b>             |
| <b>2</b>           | <b>4.2</b>                    | <b>79</b>                        | <b>29</b>                        | <b>0.83</b>             |
| <b>3</b>           | <b>5.4</b>                    | <b>37</b>                        | <b>19</b>                        | <b>0.81</b>             |

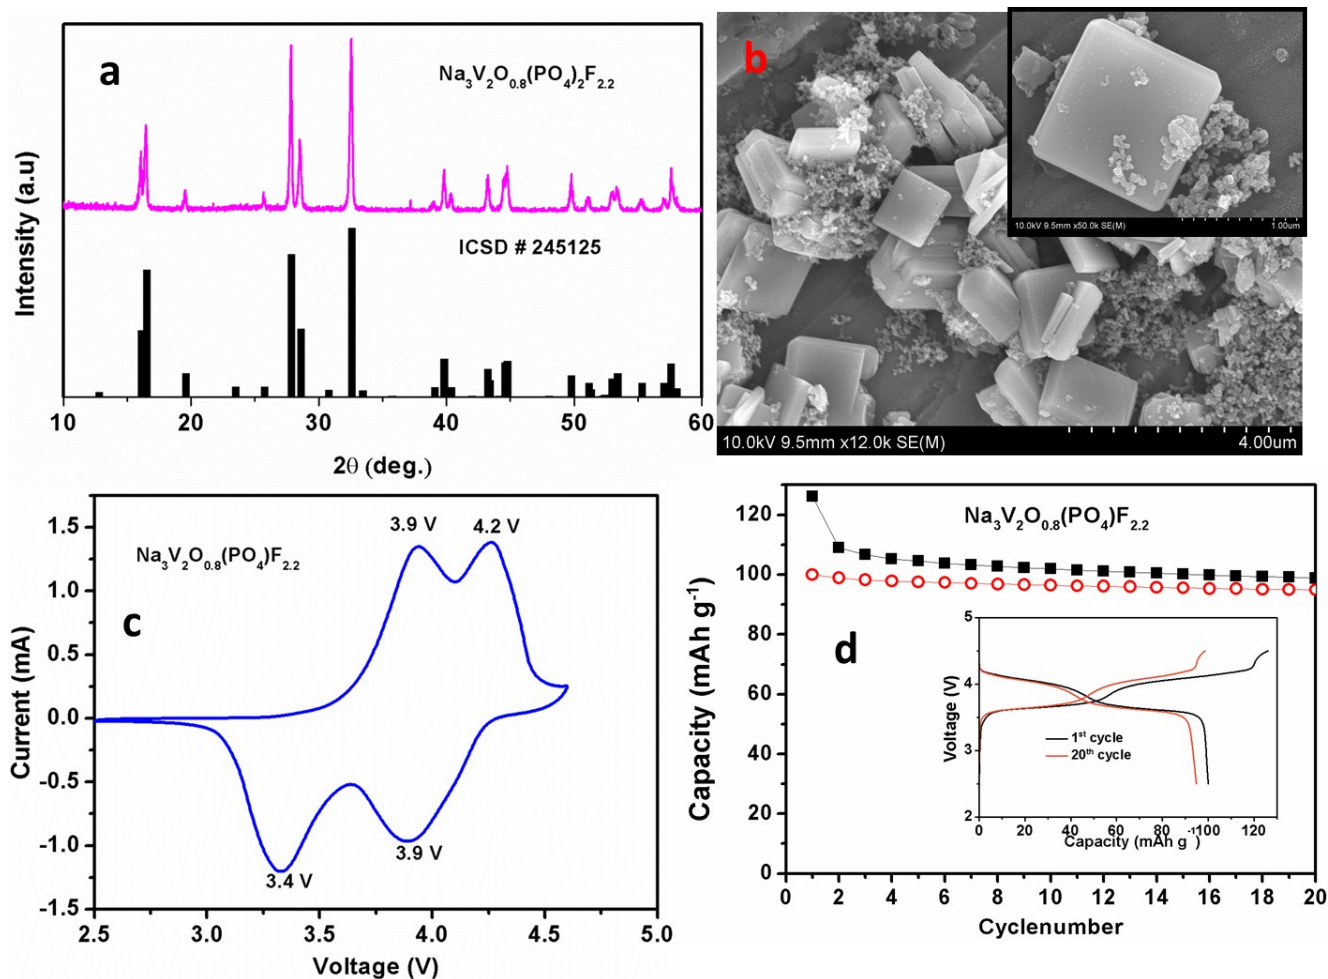

**Fig. S2** (a) XRD patterns, (b) SEM images and (c) Cyclic voltammetry for the prepared  $\text{Na}_3\text{V}_2\text{O}_{2x}(\text{PO}_4)_2\text{F}_{3-2x}$  sample. (d) Half-cell galvanostatic cycling performance at 0.1C rate up to 20 cycles.
